# Supplementary material
Source: publisher figshare collection journal article supplement (https://tandf.figshare.com/ndownloader/files/31708093)

## Supplementary Material for *Planning for extreme heat: A national survey of U.S. planners*

### Table of Contents

|                                                                                                     |    |
|-----------------------------------------------------------------------------------------------------|----|
| Appendix 1 Survey Questions .....                                                                   | 2  |
| Appendix 2 Targeted sample cities with population, region, size, and survey completion status ..... | 8  |
| Appendix 3 Convenience sample distribution lists .....                                              | 11 |
| Appendix 4 Heat impacts, random vs convenience sample.....                                          | 12 |
| Appendix 5 Extreme heat impacts, by region in the random sample .....                               | 13 |
| Appendix 6 Mean concern for extreme heat impacts and contributors, random vs convenience sample...  | 15 |
| Appendix 7 Distribution of responses on concern for heat impacts & contributors .....               | 16 |
| Appendix 8 Concern for extreme heat impacts and contributors, by region in the random sample.....   | 17 |
| Appendix 9 Concern for extreme heat, by city size in the random sample .....                        | 18 |
| Appendix 10 Heat information Sources, random vs convenience sample .....                            | 19 |
| Appendix 11 Level of government and plan types for addressing heat, random vs convenience sample .. | 20 |
| Appendix 12 Strategies implemented and perceived effectiveness, random vs convenience sample.....   | 21 |
| Appendix 13 Strategies implemented, by region in random sample .....                                | 22 |
| Appendix 14 Perceived effectiveness of strategies, by region in random sample.....                  | 23 |
| Appendix 15 Strategies implemented, by city in the size random sample .....                         | 24 |
| Appendix 16 Heat planning barriers random vs convenience sample.....                                | 25 |
| Appendix 17 Independent and dependent variables .....                                               | 26 |
| Appendix 18 Correlations between variables: .....                                                   | 29 |

## Appendix 1 Survey Questions

1. Are you employed or self-employed as a planner?
2. In your role as a planner, how concerned are you about extreme heat (summertime temperatures that are much hotter and/or humid than average) in the community(ies) you work with?

|                       | Not at all concerned | A little bit concerned | Somewhat concerned | Very concerned |
|-----------------------|----------------------|------------------------|--------------------|----------------|
| Economic impacts      |                      |                        |                    |                |
| Health impacts        |                      |                        |                    |                |
| Environmental impacts |                      |                        |                    |                |
| Overall               |                      |                        |                    |                |

3. In your role as a planner, how concerned are you about the following two contributors to extreme heat risk in the community(ies) you work with?

|                   | Not at all concerned | A little bit concerned | Somewhat concerned | Very concerned |
|-------------------|----------------------|------------------------|--------------------|----------------|
| Urban heat island |                      |                        |                    |                |
| Climate change    |                      |                        |                    |                |

4. To the best of your knowledge, have any of the following been impacted in the last five years due to extreme heat in the community(ies) you work with? (select all that apply)
  - Public health
  - Quality of life
  - Economic productivity
  - Economic development
  - Labor productivity
  - Retail
  - Tourism
  - Utility functioning
  - Transportation
  - Water use
  - Energy use
  - Urban vegetation or wildlife
  - Other (Please specify)

5. To the best of your knowledge, is extreme heat specifically addressed in the following plans anywhere in the community(ies) you work with?
  - Zoning codes and regulations
  - Building codes
  - Comprehensive or general plans
  - Sustainability, climate action, or resilience plans
  - Hazard mitigation plans
  - Emergency response plans
  - Other (Please specify)
6. What are the names of these plans?
7. In your opinion, which level(s) of jurisdiction should be primarily responsible for planning for extreme heat? (Check all that apply)
  - Local (city or town)
  - Count
  - Regional
  - State
  - National
  - Don't know
8. Are any of the following sources of extreme heat information used in the community(ies) you work with?

|                                               | No - because they are not useful | No - because the information is currently unavailable | Yes - currently in use | Not sure |
|-----------------------------------------------|----------------------------------|-------------------------------------------------------|------------------------|----------|
| Land surface temperature map                  |                                  |                                                       |                        |          |
| Ambient air temperature maps                  |                                  |                                                       |                        |          |
| Heat vulnerability maps                       |                                  |                                                       |                        |          |
| Real-time ambient air temperature readings    |                                  |                                                       |                        |          |
| Historic temperature information              |                                  |                                                       |                        |          |
| Future temperature projections and statistics |                                  |                                                       |                        |          |

Future targeted heat wave  
scenarios for specific  
planning time periods

Heat index

Vegetation or tree canopy  
maps

Other (please specify)

9. Please describe the extreme heat information sources used in the community(ies) you work with and how they are used in more detail.

10. What sources of heat information would be most useful in the community(ies) you work with?

11. To the best of your knowledge, has the community(ies) you work with implemented any of the following strategies to address extreme heat?

|                                    | Yes | No | Don't know |
|------------------------------------|-----|----|------------|
| Building material and reflectivity |     |    |            |
| Weatherization/building retrofits  |     |    |            |
| Urban design/layout                |     |    |            |
| Manmade shade structures           |     |    |            |
| Urban forestry/tree canopy         |     |    |            |
| Green roofs/walls                  |     |    |            |
| Water features                     |     |    |            |
| Drinking fountains                 |     |    |            |
| Cooling centers                    |     |    |            |
| Informational/awareness campaigns  |     |    |            |
| Emergency response coordination    |     |    |            |
| Warning systems                    |     |    |            |
| Utility assistance                 |     |    |            |

Vulnerability assessments

Regulations for outdoor work or recreation

Staff assigned to work on extreme heat

Other (Please specify)

12. How effective do you consider each of the following strategies for addressing extreme heat in the community(ies) you work with?

|                                            | Not at all effective | A little bit effective | Somewhat effective | Very effective | Don't know |
|--------------------------------------------|----------------------|------------------------|--------------------|----------------|------------|
| Building material and reflectivity         |                      |                        |                    |                |            |
| Weatherization/building retrofits          |                      |                        |                    |                |            |
| Urban design/layout                        |                      |                        |                    |                |            |
| Manmade shade structures                   |                      |                        |                    |                |            |
| Urban forestry/tree canopy                 |                      |                        |                    |                |            |
| Green roofs/walls                          |                      |                        |                    |                |            |
| Water features                             |                      |                        |                    |                |            |
| Drinking fountains                         |                      |                        |                    |                |            |
| Cooling centers                            |                      |                        |                    |                |            |
| Informational/awareness campaigns          |                      |                        |                    |                |            |
| Emergency response coordination            |                      |                        |                    |                |            |
| Warning systems                            |                      |                        |                    |                |            |
| Utility assistance                         |                      |                        |                    |                |            |
| Vulnerability assessments                  |                      |                        |                    |                |            |
| Regulations for outdoor work or recreation |                      |                        |                    |                |            |

Staff assigned to work  
on extreme heat

Other (Please specify)

13. To what degree do you consider the following as barriers to extreme heat planning in the community(ies) you work with?

|                                                    | Not a<br>barrier | Slight<br>barrier | Moderate<br>barrier | Significant<br>barrier | Don't<br>know |
|----------------------------------------------------|------------------|-------------------|---------------------|------------------------|---------------|
| Data on extreme heat risk                          |                  |                   |                     |                        |               |
| Spatial resolution of existing information         |                  |                   |                     |                        |               |
| Temporal scale of existing information             |                  |                   |                     |                        |               |
| Uncertainty/reliability of existing information    |                  |                   |                     |                        |               |
| Expertise to understand existing information       |                  |                   |                     |                        |               |
| Knowledge of heat strategies                       |                  |                   |                     |                        |               |
| Funding                                            |                  |                   |                     |                        |               |
| Time and staff                                     |                  |                   |                     |                        |               |
| Leadership                                         |                  |                   |                     |                        |               |
| Public support                                     |                  |                   |                     |                        |               |
| Coordination between agencies and/or jurisdictions |                  |                   |                     |                        |               |
| Other hazards or issues that are higher priority   |                  |                   |                     |                        |               |
| Other (please specify)                             |                  |                   |                     |                        |               |

14. Select the state(s) in which you primarily work

15. Please list the community(ies) in which you primarily work

16. Which of the following best describes your employer?
- Academic institution
  - Public planning agency
  - Other public agency
  - Private sector
  - NGO or non-profit
  - Self-employed
  - Other (Please specify)
17. Which of the following best describes the scale of the planning jurisdiction(s) with which you currently work? (select all that apply)
- Municipal
  - County or parish
  - Regional
  - State or territory
  - Tribal
  - Special district (i.e. water district, school, etc.)
  - International
  - Other (Please specify)
18. Which of the following describes your area(s) of specialization in planning? (select all that apply)
- Community activism/empowerment
  - Community development
  - Comprehensive/long-range planning
  - Economic development
  - Environment/natural resources planning
  - Food systems planning
  - Hazard mitigation/disaster recovery planning
  - Historic preservation
  - Housing
  - Land use and code enforcement
  - Parks and recreation
  - Planning management and finance
  - Transportation planning
  - Urban design
19. Is there anything else about extreme heat planning or this survey that you would like us to know?

**Appendix 2 Targeted sample cities with population, region, size, and survey completion status**

| City                     | State         | Population | NCA Region                 | Size   | Survey completed<br>Y=yes<br>N=no |
|--------------------------|---------------|------------|----------------------------|--------|-----------------------------------|
| Hawaii (County)          | Hawaii        | 185079     | Hawaii and Pacific Islands | medium | Y                                 |
| Honolulu (County & City) | Hawaii        | 347884     | Hawaii and Pacific Islands | large  | Y                                 |
| Cleveland                | Ohio          | 390113     | Midwest                    | large  | Y                                 |
| Minneapolis              | Minnesota     | 400070     | Midwest                    | large  | Y                                 |
| Indianapolis             | Indiana       | 843393     | Midwest                    | large  | Y                                 |
| Brooklyn Park            | Minnesota     | 78373      | Midwest                    | medium | Y                                 |
| St. Clair Shores         | Michigan      | 60070      | Midwest                    | medium | Y                                 |
| Carol Stream             | Illinois      | 40379      | Midwest                    | small  | Y                                 |
| Romeoville               | Illinois      | 39650      | Midwest                    | small  | Y                                 |
| Pittsburgh               | Pennsylvania  | 305841     | Northeast                  | large  | Y                                 |
| Baltimore                | Maryland      | 622104     | Northeast                  | large  | Y                                 |
| Rochester                | New York      | 210358     | Northeast                  | medium | Y                                 |
| Paterson                 | New Jersey    | 145948     | Northeast                  | medium | Y                                 |
| Bowie                    | Maryland      | 56759      | Northeast                  | medium | Y                                 |
| Salem                    | Massachusetts | 42544      | Northeast                  | small  | Y                                 |
| Woonsocket               | Rhode Island  | 41026      | Northeast                  | small  | Y                                 |
| Omaha                    | Nebraska      | 434353     | Northern Great Plains      | large  | Y                                 |
| Bismarck                 | North Dakota  | 67034      | Northern Great Plains      | medium | Y                                 |
| Fargo                    | North Dakota  | 113658     | Northern Great Plains      | medium | Y                                 |
| Grand Forks              | North Dakota  | 54932      | Northern Great Plains      | medium | Y                                 |
| Grand Island             | Nebraska      | 50550      | Northern Great Plains      | medium | Y                                 |
| Lincoln                  | Nebraska      | 268738     | Northern Great Plains      | medium | Y                                 |
| Cheyenne                 | Wyoming       | 62448      | Northern Great Plains      | medium | Y                                 |
| Sioux Falls              | South Dakota  | 164676     | Northern Great Plains      | medium | Y                                 |
| Missoula                 | Montana       | 69122      | Northern Great Plains      | medium | Y                                 |
| Casper                   | Wyoming       | 59628      | Northern Great Plains      | medium | Y                                 |
| Bozeman                  | Montana       | 39860      | Northern Great Plains      | small  | Y                                 |
| Seattle                  | Washington    | 652405     | Northwest                  | large  | Y                                 |
| Portland                 | Oregon        | 609456     | Northwest                  | large  | Y                                 |
| Boise City               | Idaho         | 214237     | Northwest                  | medium | Y                                 |
| Corvallis                | Oregon        | 55298      | Northwest                  | medium | Y                                 |
| Nampa                    | Idaho         | 86518      | Northwest                  | medium | Y                                 |
| Lakewood                 | Washington    | 59097      | Northwest                  | medium | Y                                 |

|                   |                |         |                       |        |   |
|-------------------|----------------|---------|-----------------------|--------|---|
| Yakima            | Washington     | 93257   | Northwest             | medium | Y |
| Lake Oswego       | Oregon         | 37610   | Northwest             | small  | Y |
| Edmonds           | Washington     | 40727   | Northwest             | small  | Y |
| Virginia Beach    | Virginia       | 448479  | Southeast             | large  | Y |
| Raleigh           | North Carolina | 431746  | Southeast             | large  | Y |
| Charleston        | South Carolina | 127999  | Southeast             | medium | Y |
| Mount Pleasant    | South Carolina | 74885   | Southeast             | medium | Y |
| Norfolk           | Virginia       | 246139  | Southeast             | medium | Y |
| Hickory           | North Carolina | 40361   | Southeast             | small  | Y |
| Biloxi            | Mississippi    | 44820   | Southeast             | small  | Y |
| Pinellas Park     | Florida        | 49998   | Southeast             | small  | Y |
| Altamonte Springs | Florida        | 42150   | Southeast             | small  | Y |
| San Antonio       | Texas          | 1409019 | Southern Great Plains | large  | Y |
| Dallas            | Texas          | 1257676 | Southern Great Plains | large  | Y |
| Houston           | Texas          | 2195914 | Southern Great Plains | large  | Y |
| Arlington         | Texas          | 379577  | Southern Great Plains | large  | Y |
| Tulsa             | Oklahoma       | 398121  | Southern Great Plains | large  | Y |
| New Braunfels     | Texas          | 63279   | Southern Great Plains | medium | Y |
| Flower Mound      | Texas          | 68609   | Southern Great Plains | medium | Y |
| League City       | Texas          | 90983   | Southern Great Plains | medium | Y |
| Pasadena          | Texas          | 152735  | Southern Great Plains | medium | Y |
| Duncanville       | Texas          | 39605   | Southern Great Plains | small  | Y |
| Muskogee          | Oklahoma       | 38863   | Southern Great Plains | small  | Y |
| Rockwall          | Texas          | 40922   | Southern Great Plains | small  | Y |
| Hurst             | Texas          | 38448   | Southern Great Plains | small  | Y |
| Albuquerque       | New Mexico     | 556495  | Southwest             | large  | Y |
| Las Vegas         | Nevada         | 603488  | Southwest             | large  | Y |
| Fresno            | California     | 509924  | Southwest             | large  | Y |
| San Jose          | California     | 998537  | Southwest             | large  | Y |
| Henderson         | Nevada         | 270811  | Southwest             | medium | Y |
| Yorba Linda       | California     | 67032   | Southwest             | medium | Y |
| Santa Rosa        | California     | 171990  | Southwest             | medium | Y |
| Apache Junction   | Arizona        | 37130   | Southwest             | small  | Y |
| Palm Springs      | California     | 46281   | Southwest             | small  | Y |
| Draper            | Utah           | 45285   | Southwest             | small  | Y |
| Montclair         | California     | 38027   | Southwest             | small  | Y |
| Anchorage         | Alaska         | 300950  | Alaska                | large  | N |
| Fairbanks         | Alaska         | 31535   | Alaska                | small  | N |
| San Juan          | Puerto Rico    | 395326  | Caribbean             | large  | N |
| Bayamón           | Puerto Rico    | 208116  | Caribbean             | medium | N |

|                 |                      |         |                       |        |   |
|-----------------|----------------------|---------|-----------------------|--------|---|
| St. Louis       | Missouri             | 318416  | Midwest               | large  | N |
| Chicago         | Illinois             | 2718782 | Midwest               | large  | N |
| Elgin           | Illinois             | 110145  | Midwest               | medium | N |
| Dubuque         | Iowa                 | 58253   | Midwest               | medium | N |
| Lee's Summit    | Missouri             | 93184   | Midwest               | medium | N |
| Mankato         | Minnesota            | 40641   | Midwest               | small  | N |
| DeKalb          | Illinois             | 43849   | Midwest               | small  | N |
| Huber Heights   | Ohio                 | 38142   | Midwest               | small  | N |
| New York        | New York             | 8405837 | Northeast             | large  | N |
| Boston          | Massachusetts        | 645966  | Northeast             | large  | N |
| Washington      | District of Columbia | 646449  | Northeast             | large  | N |
| Fall River      | Massachusetts        | 88697   | Northeast             | medium | N |
| Bristol         | Connecticut          | 60568   | Northeast             | medium | N |
| Barnstable Town | Massachusetts        | 44641   | Northeast             | small  | N |
| Pittsfield      | Massachusetts        | 44057   | Northeast             | small  | N |
| Beverly         | Massachusetts        | 40664   | Northeast             | small  | N |
| Great Falls     | Montana              | 59351   | Northern Great Plains | medium | N |
| Bellevue        | Nebraska             | 53663   | Northern Great Plains | medium | N |
| Billings        | Montana              | 109059  | Northern Great Plains | medium | N |
| Minot           | North Dakota         | 46321   | Northern Great Plains | small  | N |
| Tacoma          | Washington           | 203446  | Northwest             | medium | N |
| Marysville      | Washington           | 63269   | Northwest             | medium | N |
| Spokane         | Washington           | 210721  | Northwest             | medium | N |
| Bremerton       | Washington           | 39056   | Northwest             | small  | N |
| Puyallup        | Washington           | 38609   | Northwest             | small  | N |
| Lacey           | Washington           | 44919   | Northwest             | small  | N |
| Nashville       | Tennessee            | 634464  | Southeast             | large  | N |
| Atlanta         | Georgia              | 447841  | Southeast             | large  | N |
| Miami           | Florida              | 417650  | Southeast             | large  | N |
| Lynchburg       | Virginia             | 78014   | Southeast             | medium | N |
| Tallahassee     | Florida              | 186411  | Southeast             | medium | N |
| Manassas        | Virginia             | 41705   | Southeast             | small  | N |
| Victoria        | Texas                | 65098   | Southern Great Plains | medium | N |
| Burleson        | Texas                | 40714   | Southern Great Plains | small  | N |
| Oakland         | California           | 406253  | Southwest             | large  | N |
| Costa Mesa      | California           | 112174  | Southwest             | medium | N |
| Hemet           | California           | 81750   | Southwest             | medium | N |
| Oakley          | California           | 38194   | Southwest             | small  | N |

### **Appendix 3 Convenience sample distribution lists**

- APA Hazard Mitigation and Disaster Recovery Division
- APA Sustainable Communities Division, Environment
- APA Natural Resources, and Energy Division
- APA National Chapter Presidents' Forum
- U.S. National Oceanic and Atmospheric Administration (NOAA) Climate Program Office
- Global Heat Health Information Network (GHHIN)
- University of Arizona Extreme Heat Network
- Trust for Public Land's community stakeholders

#### Appendix 4 Heat impacts, random vs convenience sample

| Impact                       | Random Sample | Convenience Sample |
|------------------------------|---------------|--------------------|
| Energy use                   | 67%           | 65%                |
| Water use                    | 61%           | 54%                |
| Urban vegetation or wildlife | 51%           | 54%                |
| Public health                | 46%           | 73%                |
| Quality of life              | 43%           | 68%                |
| Utility Functioning          | 23%           | 37%                |
| Tourism                      | 20%           | 26%                |
| Economic Productivity        | 20%           | 30%                |
| Transportation               | 20%           | 35%                |
| Labor productivity           | 16%           | 33%                |
| Economic Development         | 10%           | 16%                |
| Other                        | 7%            | 12%                |
| Retail                       | 4%            | 11%                |

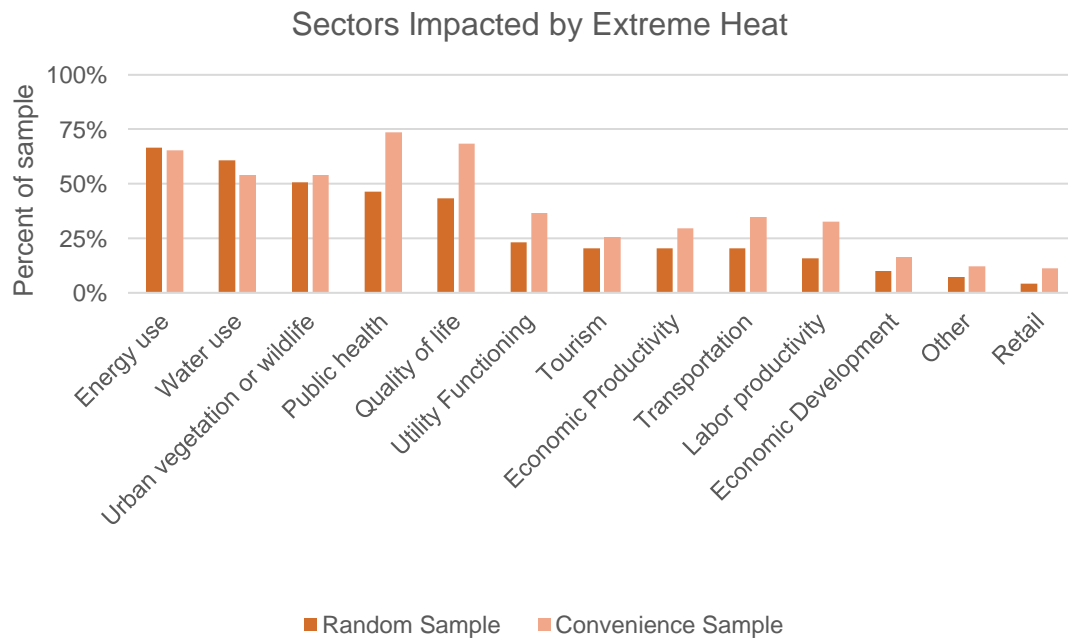

## Appendix 5 Extreme heat impacts, by region in the random sample

| Number of respondents reporting impact, by region |                            |         |           |                       |           |           |                       |           |
|---------------------------------------------------|----------------------------|---------|-----------|-----------------------|-----------|-----------|-----------------------|-----------|
| NCA Region                                        | Hawaii and Pacific Islands | Midwest | Northeast | Northern Great Plains | Northwest | Southeast | Southern Great Plains | Southwest |
| Public health                                     | 0                          | 5       | 5         | 3                     | 4         | 1         | 8                     | 6         |
| Quality of life                                   | 2                          | 3       | 6         | 2                     | 4         | 2         | 7                     | 4         |
| Economic productivity                             | 1                          | 1       | 1         | 4                     | 2         | 2         | 3                     | 0         |
| Economic development                              | 0                          | 1       | 0         | 0                     | 2         | 0         | 2                     | 2         |
| Labor productivity                                | 0                          | 0       | 1         | 0                     | 2         | 1         | 4                     | 3         |
| Retail                                            | 0                          | 1       | 0         | 0                     | 2         | 0         | 0                     | 0         |
| Tourism                                           | 0                          | 1       | 2         | 1                     | 2         | 1         | 3                     | 4         |
| Utility functioning                               | 0                          | 3       | 1         | 0                     | 2         | 2         | 5                     | 3         |
| Transportation                                    | 0                          | 2       | 0         | 1                     | 3         | 2         | 3                     | 3         |
| Water use                                         | 1                          | 3       | 5         | 6                     | 3         | 5         | 10                    | 9         |
| Energy use                                        | 2                          | 5       | 7         | 4                     | 4         | 6         | 11                    | 7         |
| Urban vegetation or wildlife                      | 2                          | 3       | 5         | 5                     | 3         | 2         | 8                     | 7         |
| TOTAL                                             | 2                          | 7       | 7         | 11                    | 9         | 9         | 13                    | 11        |

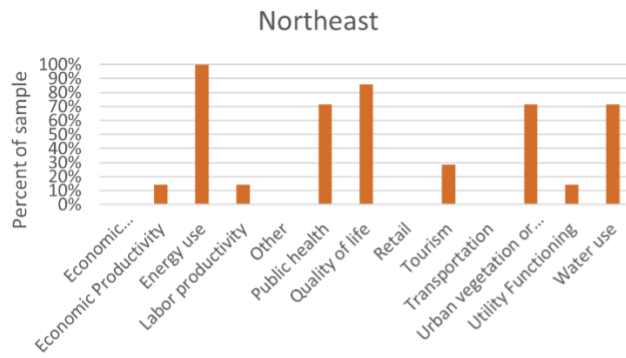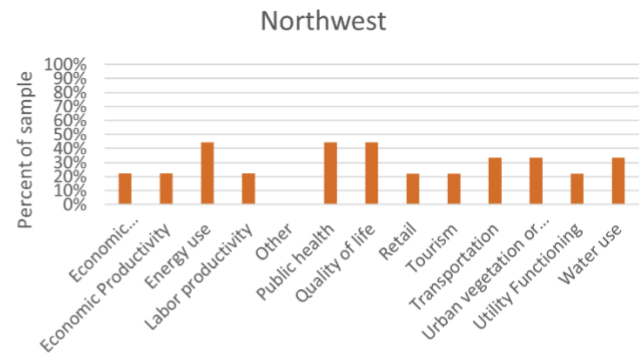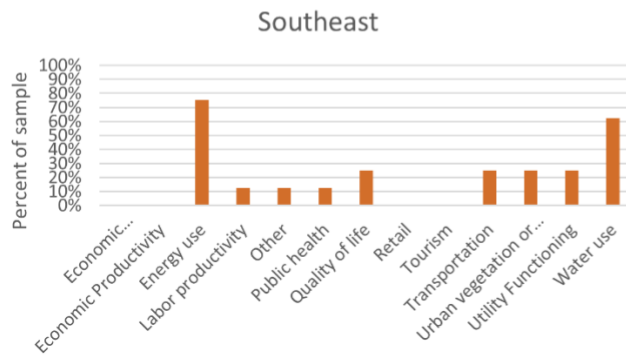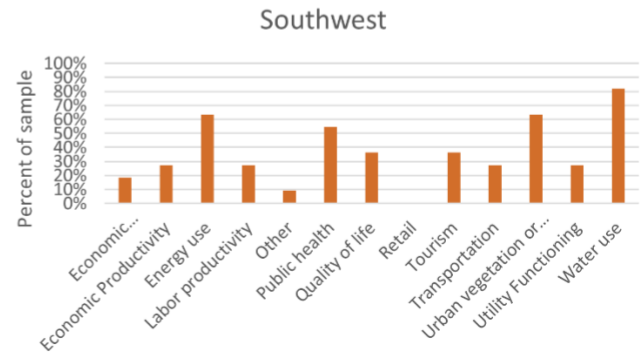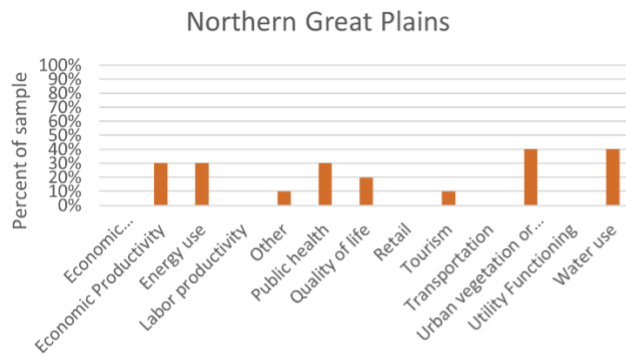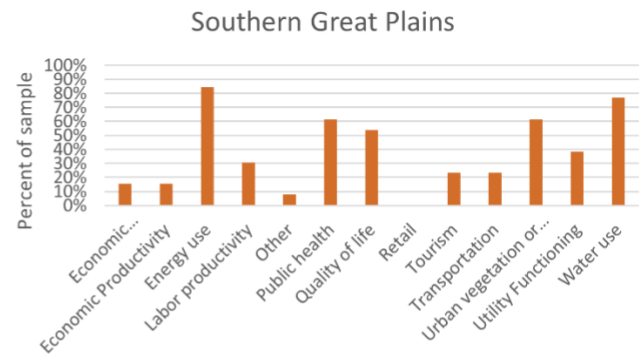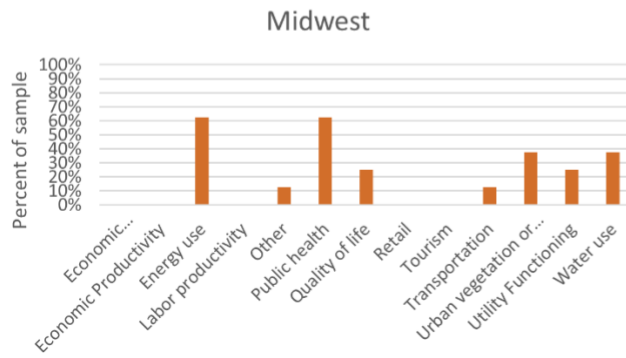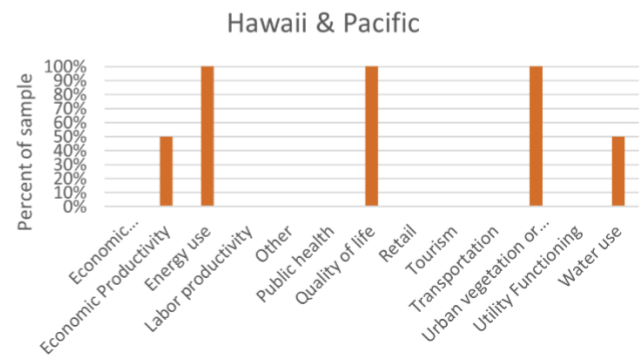

## Appendix 6 Mean concern for extreme heat impacts and contributors, random vs convenience sample

| Concern           | Random Sample | Convenience Sample |
|-------------------|---------------|--------------------|
| Overall           | 3             | 3.38               |
| Economic          | 2.64          | 2.89               |
| Environmental     | 3.19          | 3.48               |
| Health            | 2.97          | 3.44               |
| Climate Change    | 3.29          | 3.62               |
| Urban Heat Island | 2.93          | 3.22               |

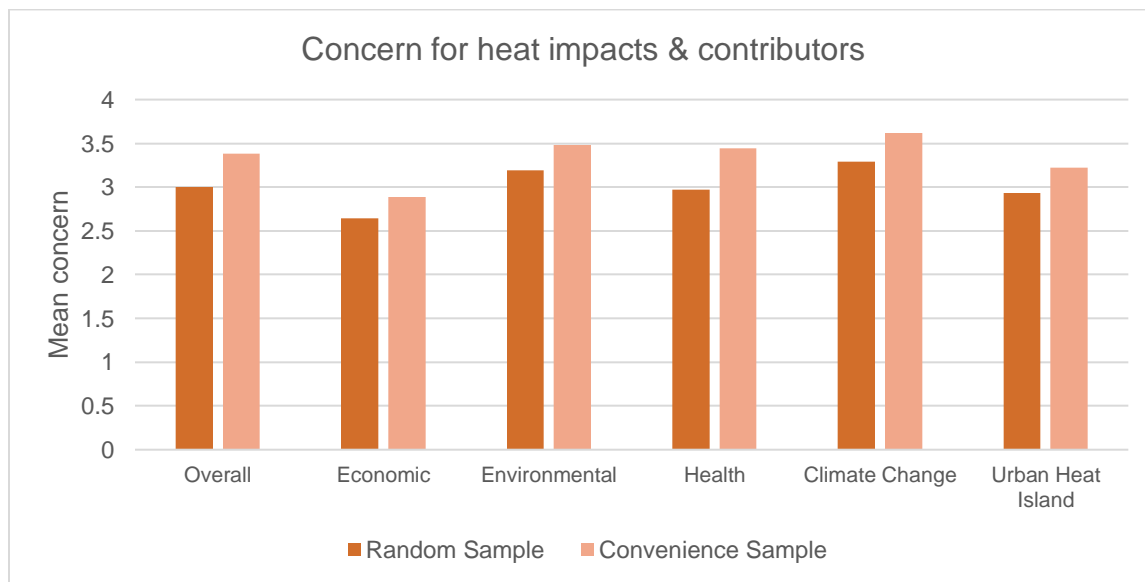

## Appendix 7 Distribution of responses on concern for heat impacts & contributors

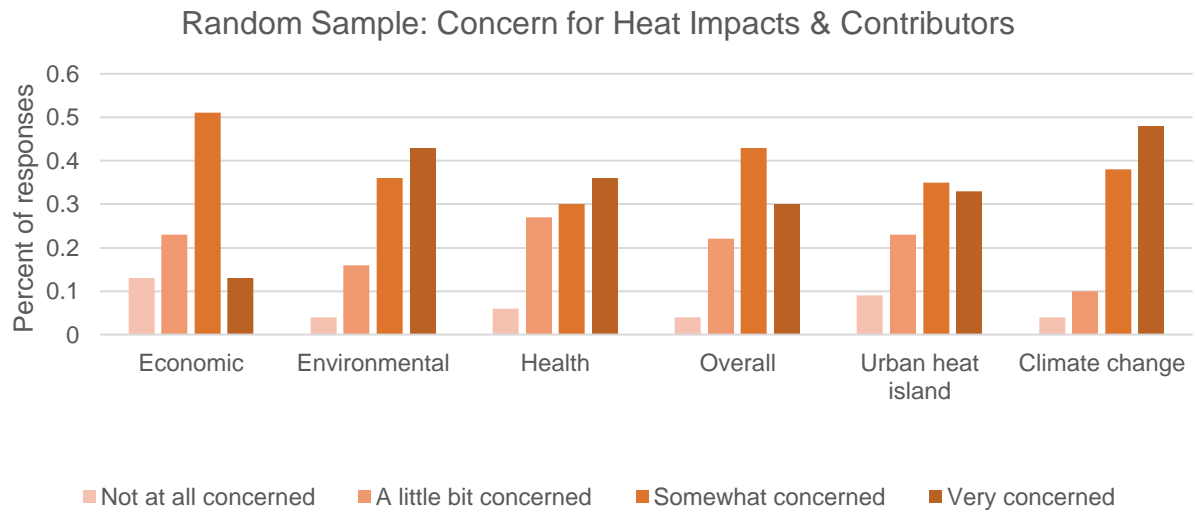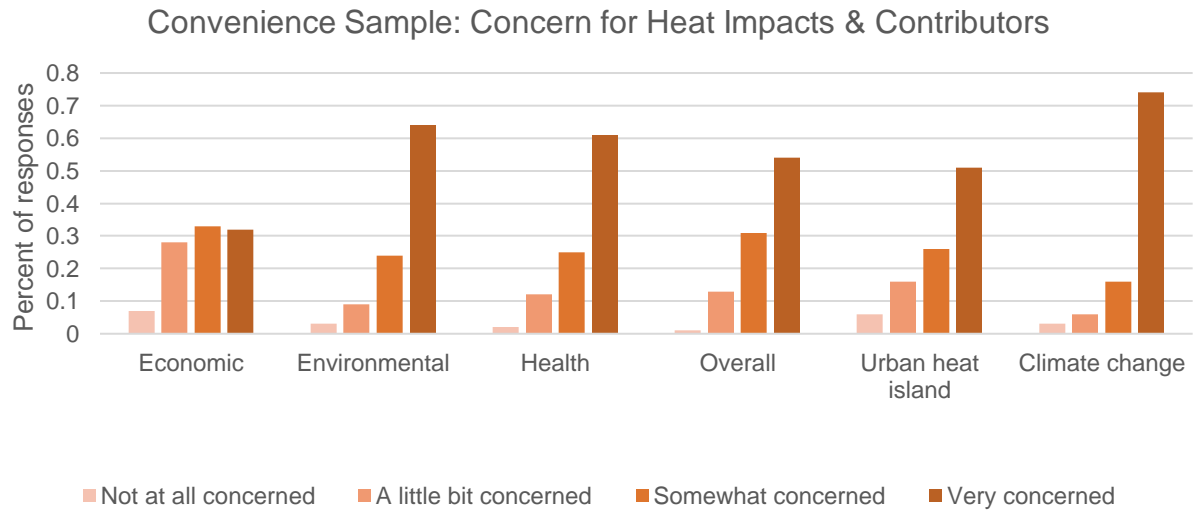

## Appendix 8 Concern for extreme heat impacts and contributors, by region in the random sample

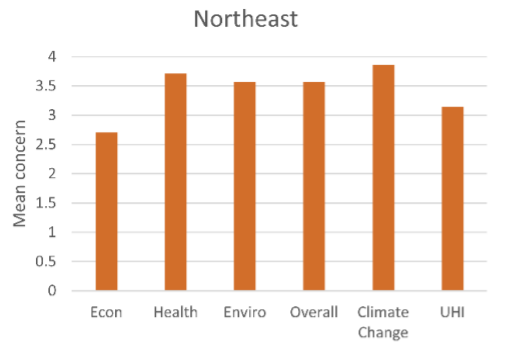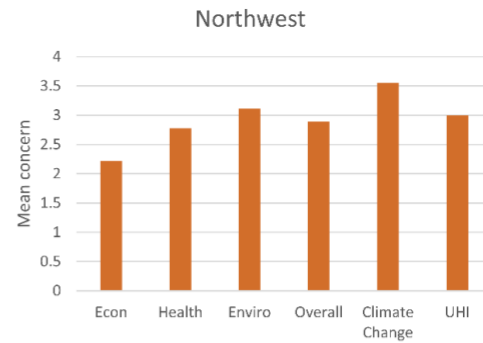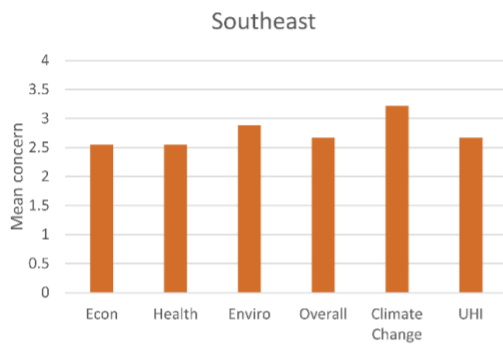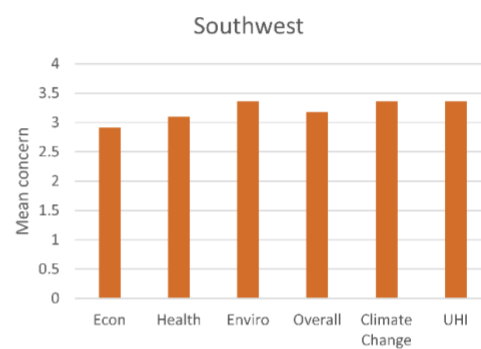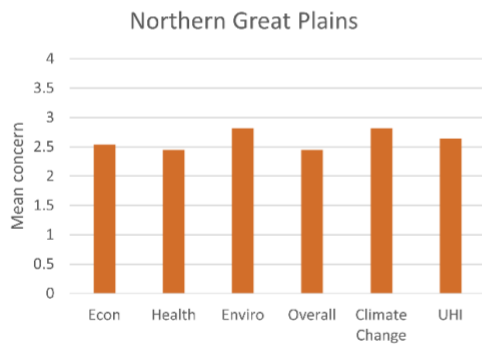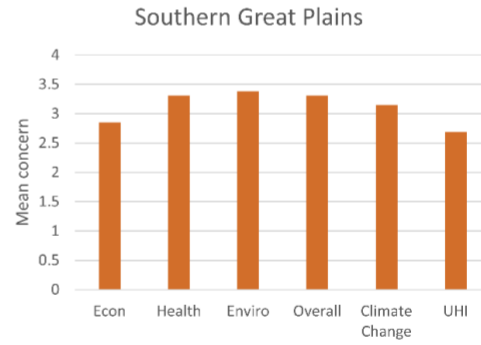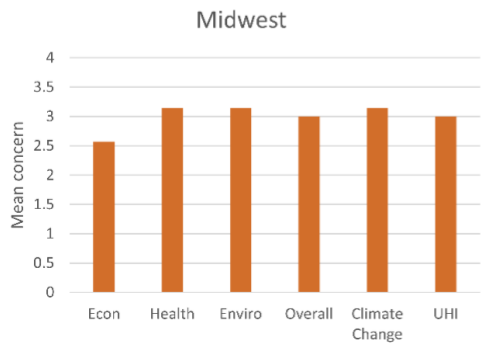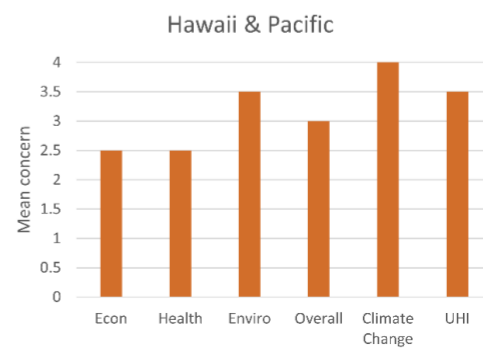

### Appendix 9 Concern for extreme heat, by city size in the random sample

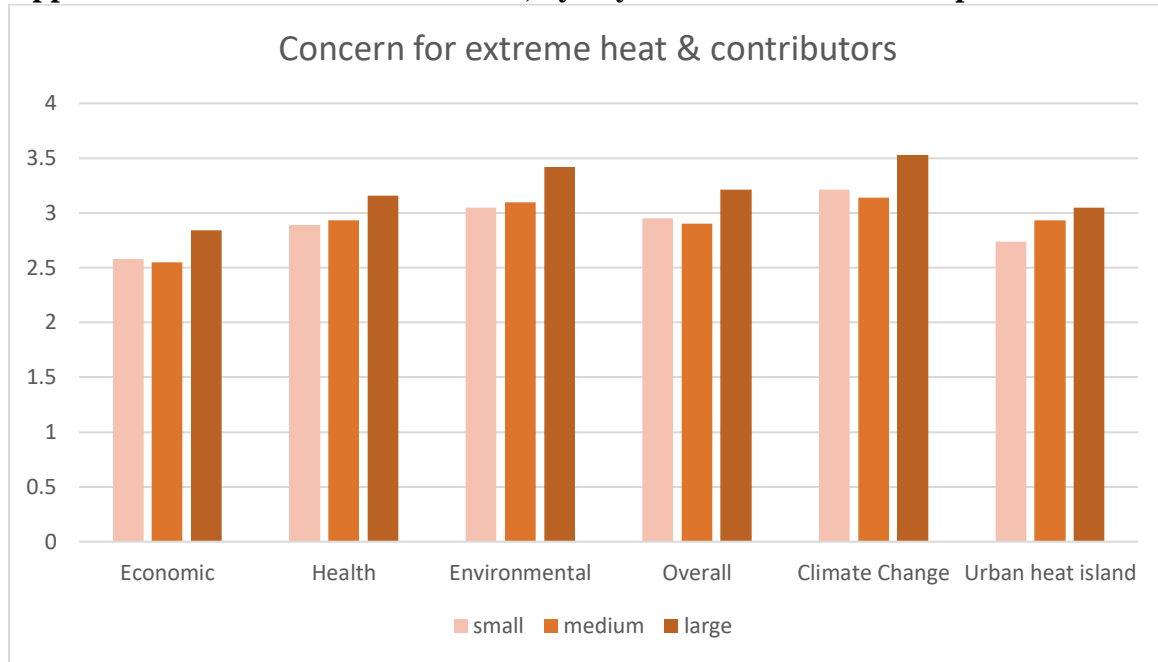

**Appendix 10 Heat information Sources, random vs convenience sample: Sources that planners reported using; and sources that planners do not use because they are unavailable**

| Information Source                  | Used          |                    | Not used because unavailable |                    |
|-------------------------------------|---------------|--------------------|------------------------------|--------------------|
|                                     | Random Sample | Convenience Sample | Random Sample                | Convenience Sample |
| Vegetation/tree maps                | 77%           | 82%                | 17%                          | 17%                |
| Heat index                          | 74%           | 79%                | 13%                          | 16%                |
| Historic temperature data           | 63%           | 85%                | 20%                          | 13%                |
| Future projections & statistics     | 46%           | 71%                | 37%                          | 27%                |
| Real-time ambient air temp readings | 46%           | 55%                | 36%                          | 38%                |
| Ambient air temp maps               | 39%           | 52%                | 44%                          | 38%                |
| Heat vulnerability maps             | 29%           | 56%                | 54%                          | 40%                |
| Land surface temp maps              | 18%           | 59%                | 65%                          | 37%                |
| Future scenarios                    | 12%           | 30%                | 68%                          | 61%                |

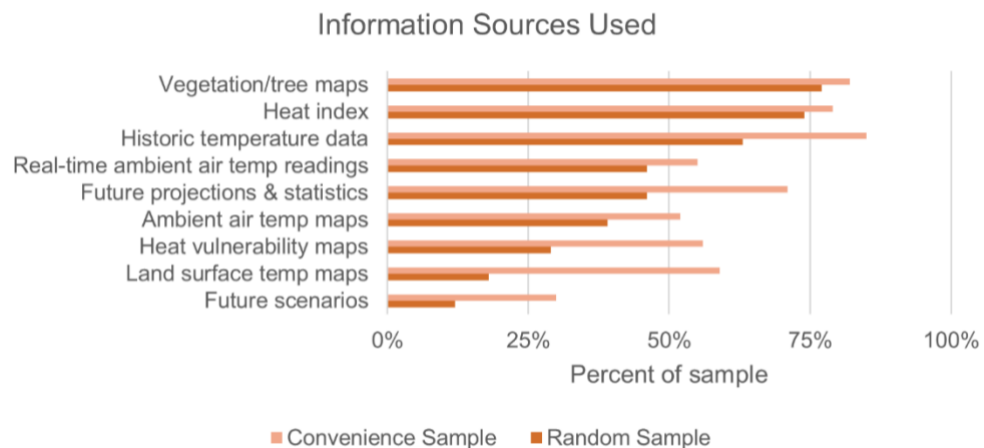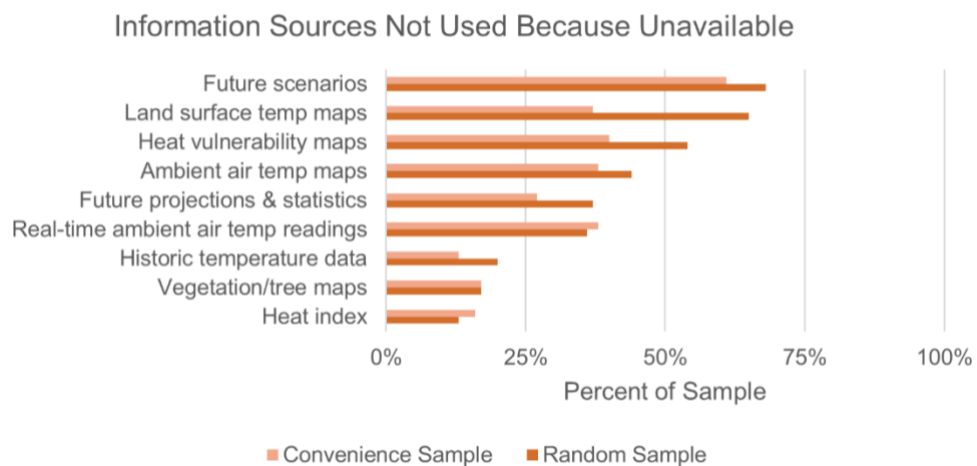

**Appendix 11 Level of government and plan types for addressing heat, random vs convenience sample**

|                                                                            | Random Sample | Convenience Sample |
|----------------------------------------------------------------------------|---------------|--------------------|
| Level of government that should be responsible for addressing extreme heat |               |                    |
| Local (city or town)                                                       | 68%           | 85%                |
| County                                                                     | 49%           | 59%                |
| Regional                                                                   | 43%           | 70%                |
| State                                                                      | 61%           | 68%                |
| National                                                                   | 48%           | 50%                |
| Plans addressing extreme heat                                              |               |                    |
| Sustainability, climate action, or resilience plans                        | 36%           | 52%                |
| Emergency response plans                                                   | 25%           | 27%                |
| Comprehensive/general plans                                                | 25%           | 19%                |
| Hazard mitigation plans                                                    | 19%           | 40%                |
| Other                                                                      | 14%           | 7%                 |
| Building codes                                                             | 10%           | 16%                |
| Zoning codes                                                               | 9%            | 11%                |

## Appendix 12 Strategies implemented and perceived effectiveness, random vs convenience sample

| Heat Resilience Strategies | Percent of sample implemented |             | Perceived effectiveness (sample mean) |             |
|----------------------------|-------------------------------|-------------|---------------------------------------|-------------|
|                            | Random                        | Convenience | Random                                | Convenience |
| Urban Forestry             | 73%                           | 80%         | 3.68                                  | 3.77        |
| Emergency Response         | 66%                           | 73%         | 3.33                                  | 3.41        |
| Weatherization             | 51%                           | 60%         | 3.38                                  | 3.4         |
| Manmade Shade              | 50%                           | 45%         | 3.32                                  | 3.14        |
| Urban Design               | 49%                           | 54%         | 3.48                                  | 3.48        |
| Warning Systems            | 49%                           | 60%         | 3.22                                  | 3.26        |
| Green roofs                | 43%                           | 61%         | 3.14                                  | 3.29        |
| Water Features             | 43%                           | 52%         | 3.08                                  | 3.04        |
| Building Materials         | 41%                           | 45%         | 3.27                                  | 3.32        |
| Drinking Fountains         | 41%                           | 52%         | 3.16                                  | 3.14        |
| Utility Assistance         | 41%                           | 64%         | 3.28                                  | 3.24        |
| Info & Awareness           | 38%                           | 70%         | 3.11                                  | 3.1         |
| Cooling Centers            | 37%                           | 65%         | 3.31                                  | 3.25        |
| Vulnerability Assessments  | 34%                           | 65%         | 3.31                                  | 3.39        |
| Regulations                | 24%                           | 30%         | 3.08                                  | 3.22        |
| Staff                      | 8%                            | 28%         | 3.16                                  | 3.26        |

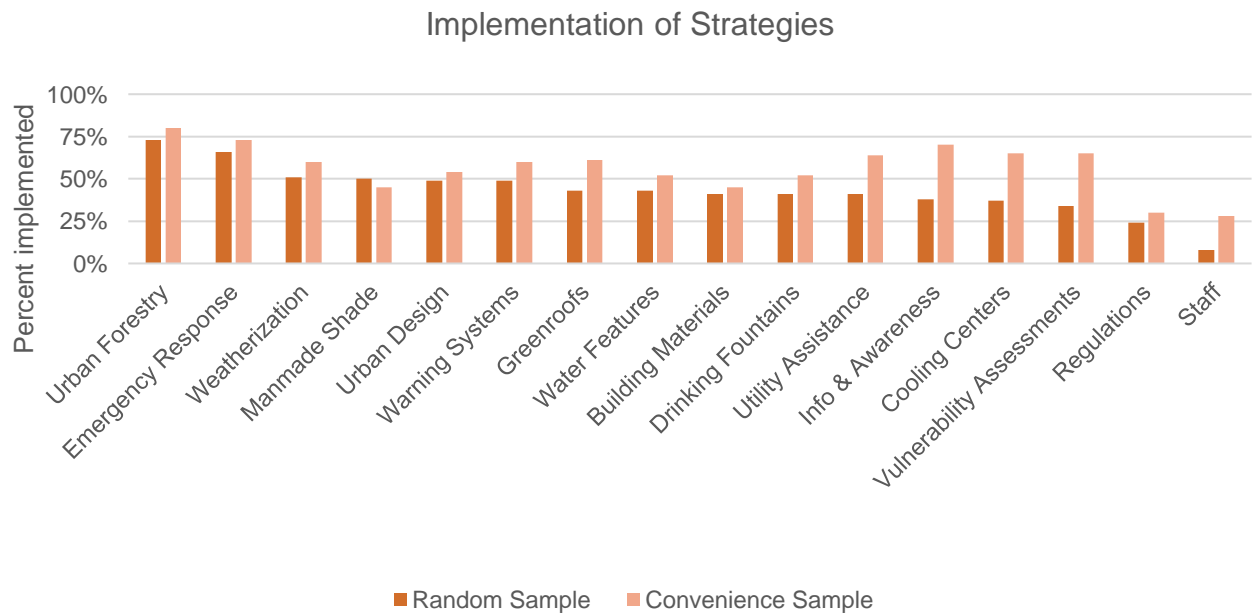

## Appendix 13 Strategies implemented, by region in random sample

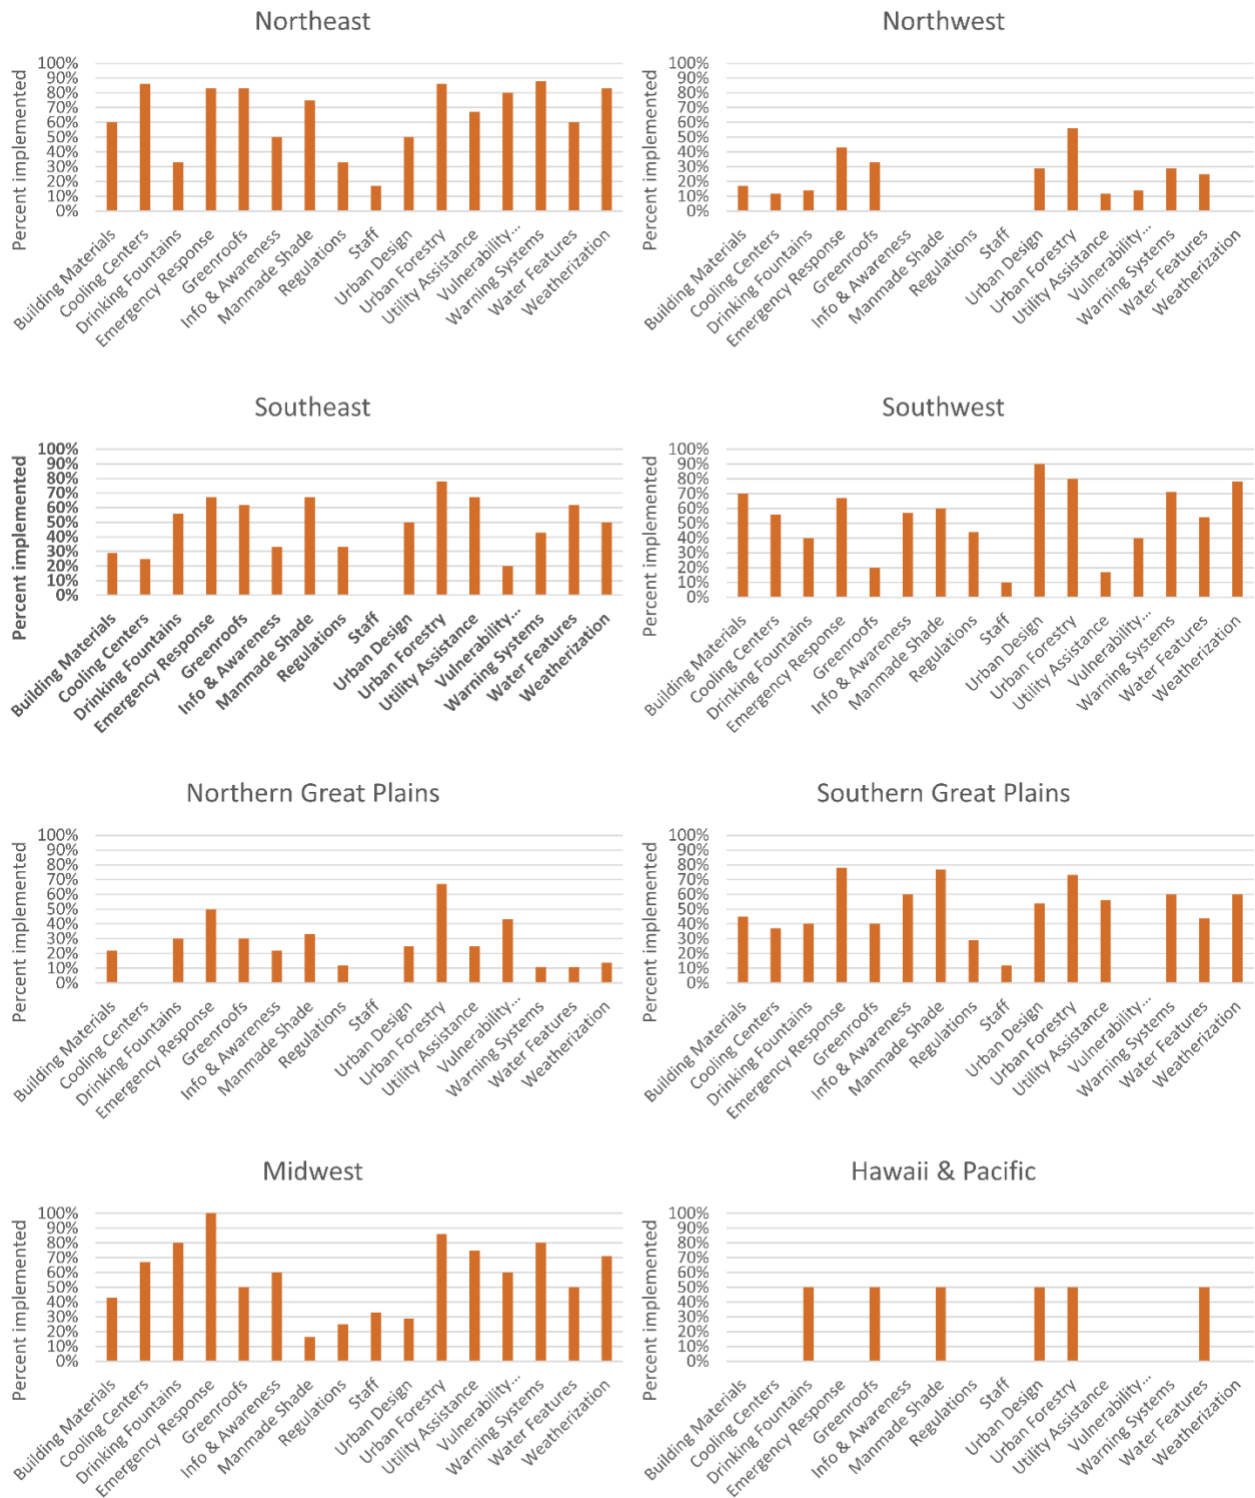

## Appendix 14 Perceived effectiveness of strategies, by region in random sample

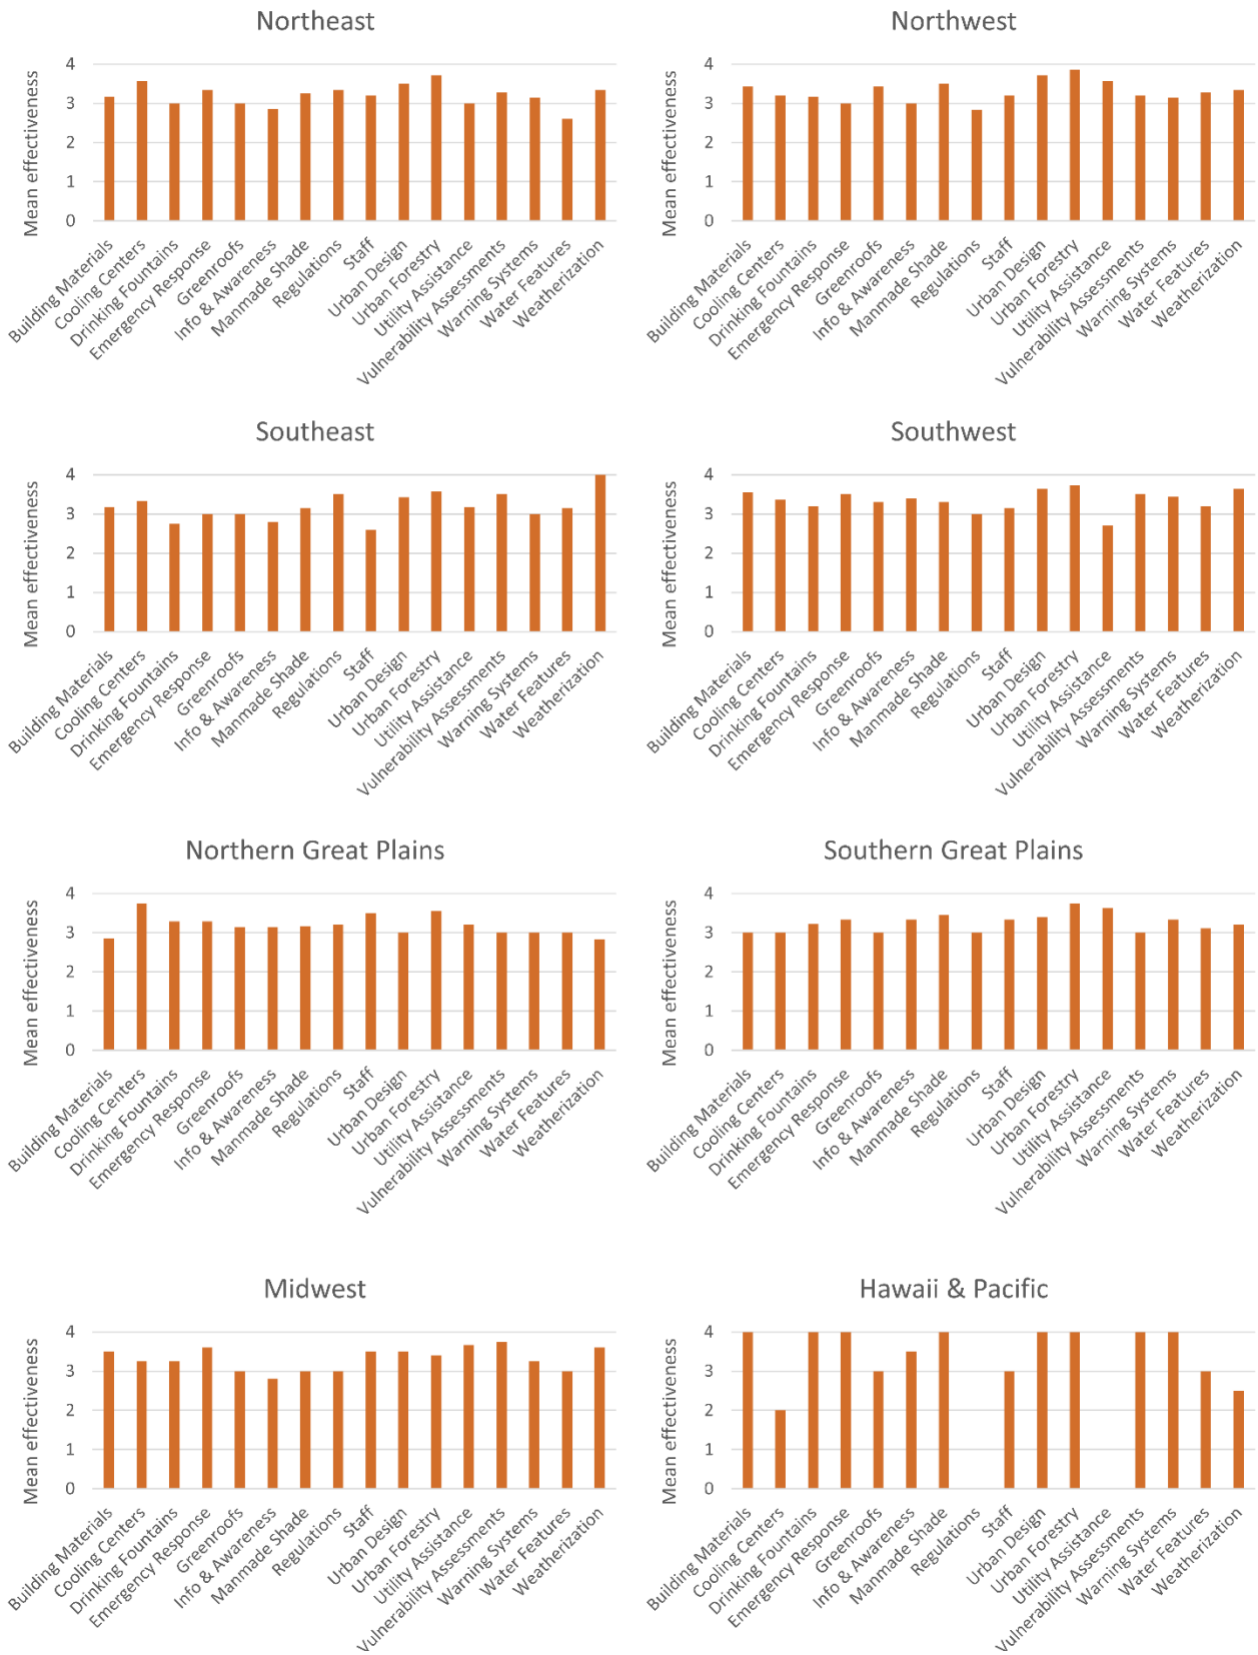

## Appendix 15 Strategies implemented, by city in the size random sample

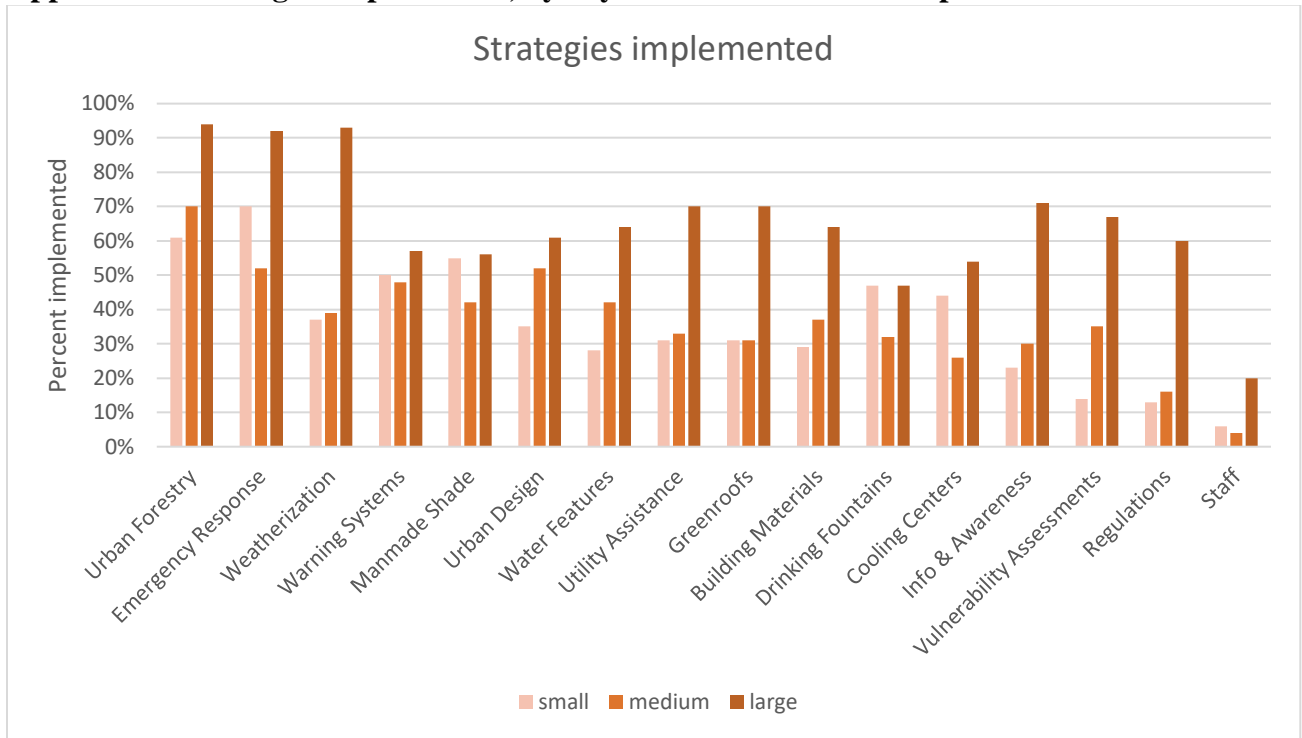

### Appendix 16 Heat planning barriers random vs convenience sample

|                         | Random Sample | Convenience Sample |
|-------------------------|---------------|--------------------|
| Funding                 | 3.74          | 2.72               |
| Time & Staff            | 3.74          | 3.39               |
| Higher Priority Issues  | 3.55          | 3.46               |
| Leadership              | 3.33          | 3.28               |
| Public Support          | 3.25          | 3.08               |
| Expertise to Understand | 3.17          | 2.81               |
| Knowledge               | 3.15          | 2.76               |
| Coordination            | 3.03          | 3.61               |
| Spatial Resolution      | 2.95          | 2.73               |
| Temporal Scale          | 2.89          | 2.83               |
| Data                    | 2.87          | 2.99               |
| Uncertainty             | 2.86          | 2.56               |

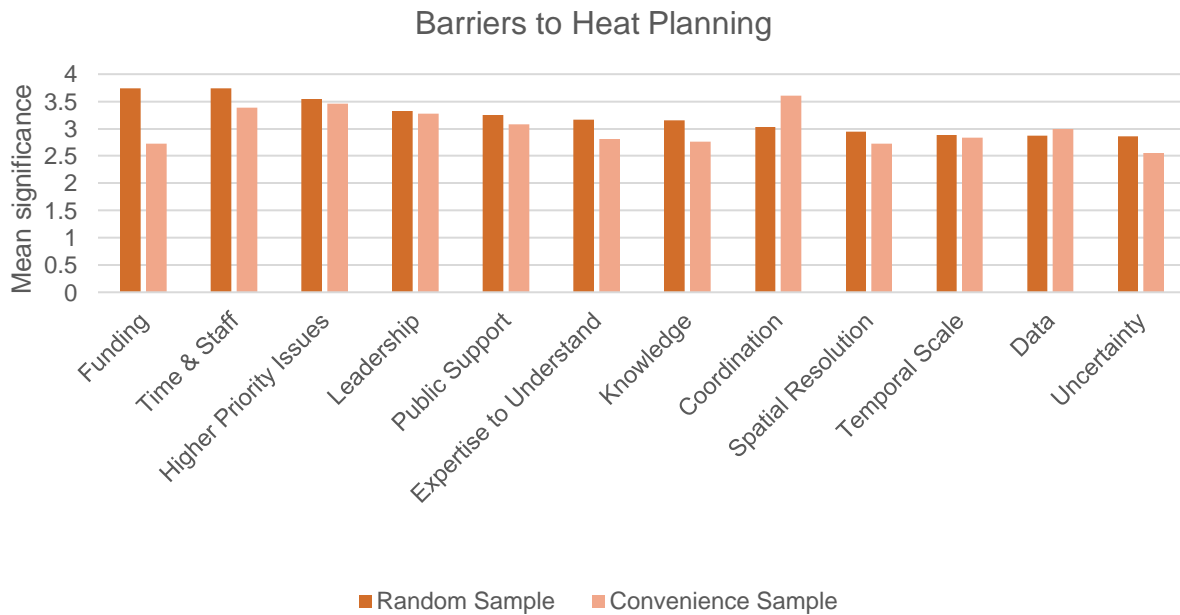

## Appendix 17 Independent and dependent variables

### Independent variables

| Index                       | Variable                                                              | Variable name                 | Rationale                                                                                                                                                                                                                                                                                                                                                       | Data description                                                                                                                                                                                                  | Source                                                                                                                                                                                                                             |
|-----------------------------|-----------------------------------------------------------------------|-------------------------------|-----------------------------------------------------------------------------------------------------------------------------------------------------------------------------------------------------------------------------------------------------------------------------------------------------------------------------------------------------------------|-------------------------------------------------------------------------------------------------------------------------------------------------------------------------------------------------------------------|------------------------------------------------------------------------------------------------------------------------------------------------------------------------------------------------------------------------------------|
| City capacity               | Population                                                            | Population                    | Research suggests larger cities are more likely to engage in climate change planning (Hamin, Gurrán, & Emlinger, 2014; Reckien et al., 2018), so we would expect that city population would predict engagement in heat planning.                                                                                                                                | Population of the city in 2013                                                                                                                                                                                    | Jones (2015)<br><a href="https://gist.github.com/Miserlou/11500b2345d3fe850c92">https://gist.github.com/Miserlou/11500b2345d3fe850c92</a>                                                                                          |
|                             | Median household income                                               | Median_hh_income              | Wealthier cities have more resources for action (Krause, 2011), so we would expect median income would be positively related to heat planning.                                                                                                                                                                                                                  | Median household income in the past 12 months (in 2016 inflation-adjusted dollars) (ACS 5-Year Estimates)                                                                                                         | MIT Election Data and Science Lab<br><a href="https://github.com/MEDSL/2018-elections-unofficial/blob/master/election-context-2018.md">https://github.com/MEDSL/2018-elections-unofficial/blob/master/election-context-2018.md</a> |
| Heat vulnerable populations | Percent of the population that is nonwhite                            | Nonwhite_pct                  | Research shows heat disproportionately affects minority communities (Wilson, 2020), so cities where a greater share of the population is nonwhite might be more concerned about heat and engaged in heat planning.                                                                                                                                              | non-whites as a percentage of total population 2012-2016 (ACS 5-Year Estimates)                                                                                                                                   | MIT Election Data and Science Lab<br><a href="https://github.com/MEDSL/2018-elections-unofficial/blob/master/election-context-2018.md">https://github.com/MEDSL/2018-elections-unofficial/blob/master/election-context-2018.md</a> |
|                             | Percent of the population aged 65+                                    | Age65andolder_pct             | Research shows that heat disproportionately affects elderly populations (Hondula, Davis, Saha, Wegner, & Veazey, 2015), so cities where a greater share of the population is elderly might be more engaged in heat planning.                                                                                                                                    | population 65 years or older as a percentage of total population 2012-2016 (ACS 5-Year Estimates)                                                                                                                 | MIT Election Data and Science Lab<br><a href="https://github.com/MEDSL/2018-elections-unofficial/blob/master/election-context-2018.md">https://github.com/MEDSL/2018-elections-unofficial/blob/master/election-context-2018.md</a> |
| Politics                    | Percent of the population with less than a college degree             | Lesscollege_pct               | Research suggests that cities with more highly educated populations are more likely to commit to climate change action (Krause, 2011), so we expect that cities where more of the population has a college degree are more likely to be engaged in heat planning.                                                                                               | Population with an education of less than a bachelor's degree as a percentage of total population 2012-2016 (ACS 5-Year Estimates)                                                                                | MIT Election Data and Science Lab<br><a href="https://github.com/MEDSL/2018-elections-unofficial/blob/master/election-context-2018.md">https://github.com/MEDSL/2018-elections-unofficial/blob/master/election-context-2018.md</a> |
|                             | Vote share for Hillary Clinton in 2016 presidential election (county) | Clinton16_percent             | Research suggests that cities with a greater percentage of Democrats are more likely to commit to climate change action (Krause, 2011), so we expect that cities where more of the population voted for the Democratic presidential candidate in 2016 would be more engaged in heat planning.                                                                   | Presidential candidate vote totals in 2016                                                                                                                                                                        | MIT Election Data and Science Lab<br><a href="https://github.com/MEDSL/2018-elections-unofficial/blob/master/election-context-2018.md">https://github.com/MEDSL/2018-elections-unofficial/blob/master/election-context-2018.md</a> |
| Membership                  | City network membership scale                                         | City_Membership_Count         | Research suggests that cities in international city networks are more likely to engage in climate change planning (Reckien et al., 2018), and we would expect the same would be true for heat planning specifically.                                                                                                                                            | Scale representing the number of the following city networks the city is a member of: Climate Protection Membership, National League of Cities, 100 Resilient Cities, Urban Sustainability Directors Network, C40 | City network websites and city websites                                                                                                                                                                                            |
| Heat information            | Number of heat information sources used                               | Number_of_information_sources | Research suggests that climate information is often a barrier to climate change planning (Hamin et al., 2014; Shi, Chu, & Debats, 2015) and future climate projections are often not used in planning (Eliasson, 2000), so we expect that cities that have multiple sources of heat information will be more concerned about it and more likely to take action. | Scale representing the amount of heat information                                                                                                                                                                 | Our survey                                                                                                                                                                                                                         |
| Projected heat              | Projected average daily maximum                                       | Heat_Temp_Proj                | Research suggests that experiencing changing climate conditions is a significant predictor of climate change adaptation planning (Shi et al., 2015).                                                                                                                                                                                                            | Projected average daily maximum temperature for 2050 under RCP8.5 (weighted mean)                                                                                                                                 | US Climate Resilience Toolkit <a href="https://crt-climate-explorer.nemac.org/">https://crt-climate-explorer.nemac.org/</a>                                                                                                        |

|                  |                                             |                     |                                                                                                                                                                                                                                 |                                                                                                                                                                                            |                                                                                                                                                                                                                      |
|------------------|---------------------------------------------|---------------------|---------------------------------------------------------------------------------------------------------------------------------------------------------------------------------------------------------------------------------|--------------------------------------------------------------------------------------------------------------------------------------------------------------------------------------------|----------------------------------------------------------------------------------------------------------------------------------------------------------------------------------------------------------------------|
|                  | temperature 2050                            |                     | and we would expect the same would be true for heat planning specifically.                                                                                                                                                      |                                                                                                                                                                                            |                                                                                                                                                                                                                      |
|                  | Projected absolute Temp Change 2020-2050    | Absolute_TempChge   | Research suggests that experiencing changing climate conditions is a significant predictor of climate change adaptation planning (Shi et al., 2015), and we would expect the same would be true for heat planning specifically. | Absolute temperature change 2020-2050 under RCP8.5                                                                                                                                         | US Climate Resilience Toolkit <a href="https://crt-climate-explorer.nemac.org/">https://crt-climate-explorer.nemac.org/</a>                                                                                          |
| Experienced heat | Average annual temperature change 1970-2018 | Heat_TempChge       | Research suggests that experiencing changing climate conditions is a significant predictor of climate change adaptation planning (Shi et al., 2015), and we would expect the same would be true for heat planning specifically. | Average annual temperature change 1970-2018                                                                                                                                                | Climate Central 2019 <a href="https://cccentralassets.s3.amazonaws.com/presents/2019EarthDay_data.zip">https://cccentralassets.s3.amazonaws.com/presents/2019EarthDay_data.zip</a>                                   |
|                  | Heat wave injuries                          | Sheldus_Injuries    | Research suggests that prior experience of climate impacts predicts climate change adaptation planning (Shi et al., 2015), and we would expect the same would be true for heat planning specifically.                           | County-level heat wave injuries reported in the Spatial Hazard Events and Losses Database for the United States (SHELDUS)                                                                  | CEMHS, 2020. Spatial Hazard Events and Losses Database for the United States, Version 19.0. [Online Database]. Phoenix, AZ: Center for Emergency Management and Homeland Security, Arizona State University.         |
|                  | Heat wave fatalities                        | Sheldus_Fatalities  | Research suggests that prior experience of climate impacts predicts climate change adaptation planning (Shi et al., 2015), and we would expect the same would be true for heat planning specifically.                           | County-level heat wave deaths reported in the Spatial Hazard Events and Losses Database for the United States (SHELDUS)                                                                    | CEMHS, 2020. Spatial Hazard Events and Losses Database for the United States, Version 19.0. [Online Database]. Phoenix, AZ: Center for Emergency Management and Homeland Security, Arizona State University.         |
|                  | Change in heat wave frequency 1961-2019     | Heat_wave_freq_chng | Research suggests that experiencing changing climate conditions is a significant predictor of climate change adaptation planning (Shi et al., 2015), and we would expect the same would be true for heat planning specifically. | Changes in the number of heat waves per year; these data were analyzed from 1961 to 2019 for 50 large metropolitan areas                                                                   | US EPA Change in heat wave intensity 1961-2019 <a href="https://www.epa.gov/climate-indicators/climate-change-indicators-heat-waves">https://www.epa.gov/climate-indicators/climate-change-indicators-heat-waves</a> |
|                  | Change in heat wave duration 1961-2019      | Heat_wave_dur_chng  | Research suggests that experiencing changing climate conditions is a significant predictor of climate change adaptation planning (Shi et al., 2015), and we would expect the same would be true for heat planning specifically. | Changes in the average length of heat waves in days; these data were analyzed from 1961 to 2019 for 50 large metropolitan areas                                                            | US EPA Change in heat wave intensity 1961-2019 <a href="https://www.epa.gov/climate-indicators/climate-change-indicators-heat-waves">https://www.epa.gov/climate-indicators/climate-change-indicators-heat-waves</a> |
|                  | Change in heat wave intensity 1961-2019     | Heat_wave_int_chng  | Research suggests that experiencing changing climate conditions is a significant predictor of climate change adaptation planning (Shi et al., 2015), and we would expect the same would be true for heat planning specifically. | Changes in how hot the heat waves were, compared with the local temperature threshold for defining a heat wave; these data were analyzed from 1961 to 2019 for 50 large metropolitan areas | US EPA Change in heat wave intensity 1961-2019 <a href="https://www.epa.gov/climate-indicators/climate-change-indicators-heat-waves">https://www.epa.gov/climate-indicators/climate-change-indicators-heat-waves</a> |
|                  | Change in heat wave season 1961-2019        | Heat_wave_ssn_chng  | Research suggests that experiencing changing climate conditions is a significant predictor of climate change adaptation planning (Shi et al., 2015), and we would expect the same would be true for heat planning specifically. | Change in the number of days between the first and last heat wave of the year; these data were analyzed from 1961 to 2019 for 50 large metropolitan areas                                  | US EPA Change in heat wave intensity 1961-2019 <a href="https://www.epa.gov/climate-indicators/climate-change-indicators-heat-waves">https://www.epa.gov/climate-indicators/climate-change-indicators-heat-waves</a> |
|                  | Reported extreme heat impacts               | Impacted_scale      | Research suggests that prior experience of climate impacts predicts climate change adaptation planning (Shi et al., 2015), and we would expect the same would be true for heat planning specifically.                           | Scale variable representing the number of different sectors/systems reportedly impacted by extreme heat                                                                                    | Our survey                                                                                                                                                                                                           |

### *Dependent variables from survey*

| <b>Variable name</b>             | <b>Description</b>                                                                                                                                         |
|----------------------------------|------------------------------------------------------------------------------------------------------------------------------------------------------------|
| Concern_Overall                  | Response to survey question on overall concern for extreme heat, with responses ranging from 1- Not at all to 4- Very concerned                            |
| Concern_Health                   | Response to survey question on concern for health impacts of extreme heat, with responses ranging from 1- Not at all to 4- Very concerned                  |
| Concern_Environmental            | Response to survey question on concern for environmental impacts of extreme heat, with responses ranging from 1- Not at all to 4- Very concerned           |
| Concern_Economic                 | Response to survey question on concern for economic impacts of extreme heat, with responses ranging from 1- Not at all to 4- Very concerned                |
| Concerncontributor_UHI           | Response to survey question on concern for UHI as a contributor to extreme heat, with responses ranging from 1- Not at all to 4- Very concerned            |
| Concerncontributor_climatechange | Response to survey question on concern for climate change as a contributor to extreme heat, with responses ranging from 1- Not at all to 4- Very concerned |
| Heat_Plans_scale                 | Scale variable representing the number of different plan types addressing extreme heat according to the survey, ranging from 0-6                           |
| Heat_Plans_binary                | Binary variable indicating whether or not any extreme heat strategies were implemented, according to the survey                                            |
| Implement_scale                  | Scale variable representing the number of different extreme heat strategies according to the survey, ranging from 0-15                                     |
| Implement_binary                 | Binary variable indicating whether or not extreme heat was addressed in any plan types, according to the survey                                            |

**Appendix 18 Correlations between variables:** Pearson correlation coefficient matrix, larger, darker blue circles indicate a larger positive correlation coefficient between two variables, larger darker red circles indicate a larger negative correlation coefficient

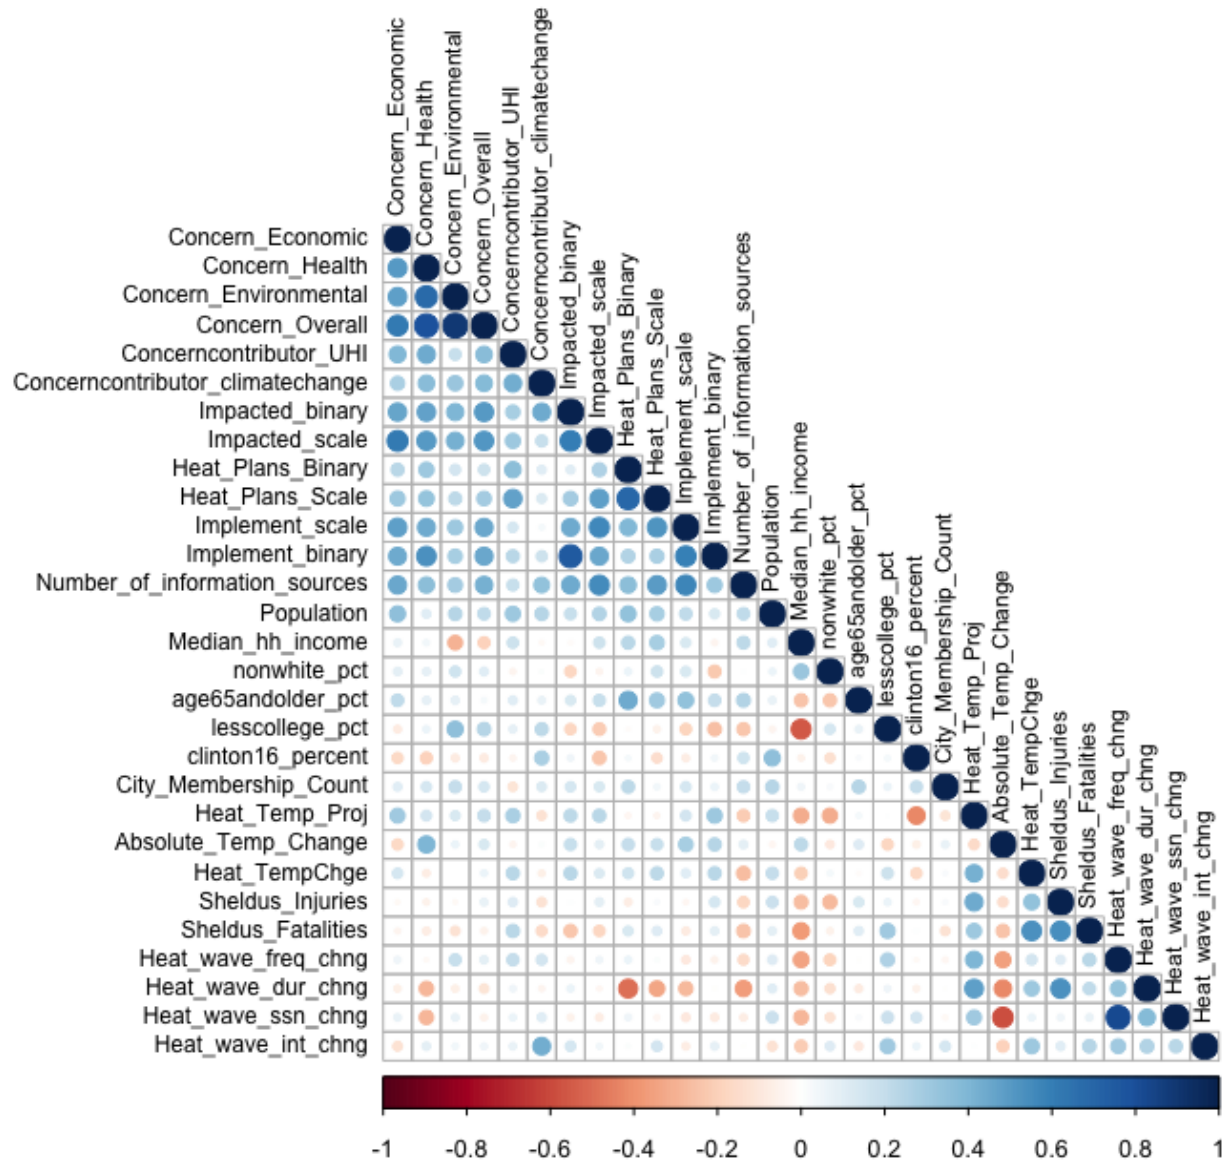

Supplement: Supplementary file 1 [file 31708093]
